# Supplementary material for: Theoretical study on the controllable preparation of superhard BC2N under high pressure
Source: Royal Society of Chemistry journal article supplement (doi:10.1039/d1tc05468f), 2021-12-22
Supplement: d1tc05468f1.pdf [file d1tc05468f1.pdf]

## SUPPLEMENTARY MATERIAL

### **Theoretical study on the controllable preparation of superhard BC<sub>2</sub>N under high pressure**

Qi Gao<sup>a</sup>, Kun Luo<sup>a\*</sup>, Feifei Ling<sup>b</sup>, Quan Huang<sup>c</sup>, Li Zhu<sup>a</sup>, Qiaoyi Han<sup>a</sup>, Yang Zhang<sup>a</sup>, Yufei Gao<sup>a</sup>, Julong He<sup>a</sup>, and Dongli Yu<sup>a\*</sup>

<sup>a</sup>Center for High Pressure Science (CHiPS), State Key Laboratory of Metastable Materials Science and Technology, Yanshan University, Qinhuangdao, 066004, PR China Email: [hiluokun@gmail.com](mailto:hiluokun@gmail.com); [ydl@ysu.edu.cn](mailto:ydl@ysu.edu.cn).

<sup>b</sup>Hebei Technology Innovation Center of Phase Change Thermal Management of Data Center, Hebei University of Water Resources and Electric Engineering

<sup>c</sup>School of Materials and Chemical Engineering, Zhongyuan University of Technology, Zhengzhou 450007, P. R. China

#### **Corresponding author**

\* K. Luo. E-mail: [hiluokun@gmail.com](mailto:hiluokun@gmail.com);

\* D. Yu. E-mail: [ydl@ysu.edu.cn](mailto:ydl@ysu.edu.cn)

**Table S1.** Lattice constant and atomic Wyckoff positions of the five BC<sub>2</sub>N structure at ambient pressure.

| Structure                        | Symmetry    | <i>a</i> (Å) | <i>c</i> (Å) | Atomic Position                                                                                                                                                                                                                                                                                                                                        |
|----------------------------------|-------------|--------------|--------------|--------------------------------------------------------------------------------------------------------------------------------------------------------------------------------------------------------------------------------------------------------------------------------------------------------------------------------------------------------|
| <i>R3m</i> -BC <sub>2</sub> N    | <i>R3m</i>  | 2.540        | 25.179       | C <sub>1</sub> :3a (1, -1, -0.054), C <sub>2</sub> :3a (1, -1, -0.116)<br>C <sub>3</sub> :3a (0.333, -0.333, -0.033), C <sub>4</sub> :3a (0.667, -0.667, -0.136)<br>B <sub>1</sub> :3a (0.333, -0.333, -0.218), B <sub>2</sub> :3a (0.667, -0.667, 0.-0.302)<br>N <sub>1</sub> :3a (0.333, -0.333, -0.279), N <sub>2</sub> :3a (0.667, -0.667, -0.196) |
| <i>P2/m</i> -BC <sub>2</sub> N   | <i>P2/m</i> | 8.866        | 4.277        | C <sub>1</sub> :2n (-0.091, 0.5, 0.181), C <sub>2</sub> :2n (0.086, 0.5, 0.187)<br>C <sub>3</sub> :2m (0.162, 0, 0.317), C <sub>4</sub> :2m (-0.165, 1, 0.317)<br>B <sub>1</sub> :2n (0.590, 0.5, 0.332), B <sub>2</sub> :2m (0.334, 0, 0.177)<br>N <sub>1</sub> :2n (0.415, 0.5, 0.297), N <sub>2</sub> :2m (0.670, 0, 0.201)                         |
| <i>P2/m</i> -BC <sub>2</sub> N-2 | <i>P2/m</i> | 9.061        | 4.230        | C <sub>1</sub> :2n (0.417, -0.5, 0.395), C <sub>2</sub> :2m (0.663, 0, 0.141)<br>C <sub>3</sub> :2m (0.337, 0, 0.488), C <sub>4</sub> :2n (0.582, 0.5, -0.021)<br>B <sub>1</sub> :2m (0.834, 0, 0.09), B <sub>2</sub> :2n (1.092, 0.5, 0.380)<br>N <sub>1</sub> :2m (1.173, 0, 0.290), N <sub>2</sub> :2n (0.916, 0.5, 0.252)                          |
| <i>R-3m</i> -BC <sub>2</sub> N   | <i>R-3m</i> | 2.547        | 25.309       | C <sub>1</sub> :6c (0.333, -0.333, -0.303), C <sub>2</sub> :6c (1, -1, -0.282)<br>B <sub>1</sub> :6c (1, -1, -0.219), N <sub>1</sub> :6c (0.667, -0.667, -0.136)                                                                                                                                                                                       |
| <i>R3m</i> -BC <sub>2</sub> N-2  | <i>R3m</i>  | 2.540        | 25.188       | C <sub>1</sub> :3a (-2, -1, 0.046), C <sub>2</sub> :3a (-0.667, -0.333, -0.225)<br>C <sub>3</sub> :3a (-1.333, -0.667, 0.026), C <sub>4</sub> :3a (-1.333, -0.667, -0.205)<br>B <sub>1</sub> :3a (-2, -1, -0.057), B <sub>2</sub> :3a (-1.333, -0.667, -0.140)<br>N <sub>1</sub> :3a (-2, -1, -0.118), N <sub>2</sub> :3a (-1.333, -0.667, -0.035)     |

**Table S2.** Calculated elastic constants  $C_{ij}$  (GPa) of five  $BC_2N$  at ambient pressure.

| Properties | <i>R3m</i> - $BC_2N$ | <i>P2/m</i> - $BC_2N$ | <i>P2/m</i> - $BC_2N$ -2 | <i>R-3m</i> - $BC_2N$ | <i>R3m</i> - $BC_2N$ -2 |
|------------|----------------------|-----------------------|--------------------------|-----------------------|-------------------------|
| $C_{11}$   | 1007.25              | 929.93                | 995.97                   | 1003.41               | 1002.76                 |
| $C_{22}$   | 1008.11              | 1035.37               | 1030.75                  | 985.4                 | 1006.37                 |
| $C_{33}$   | 1088.47              | 954.96                | 1038.42                  | 981.23                | 1066.46                 |
| $C_{44}$   | 400.27               | 382.53                | 376.11                   | 395.65                | 396.27                  |
| $C_{55}$   | 399.21               | 327.91                | 360.52                   | 378.28                | 396.86                  |
| $C_{66}$   | 456.01               | 418.39                | 429.65                   | 438.57                | 455.99                  |
| $C_{12}$   | 106.38               | 96.60                 | 104.91                   | 84.83                 | 106.73                  |
| $C_{13}$   | 55.26                | 77.14                 | 49.76                    | 53.74                 | 61.05                   |
| $C_{14}$   | 8.29                 | --                    | --                       | 4.50                  | 6.64                    |
| $C_{15}$   | 31.09                | 25.28                 | 29.75                    | -27.23                | 35.09                   |
| $C_{23}$   | 55.96                | 40.64                 | 33.80                    | 72.47                 | 59.93                   |
| $C_{25}$   | -10.75               | 3.77                  | 7.90                     | 40.57                 | -15.60                  |
| $C_{35}$   | -22.73               | 19.66                 | 20.72                    | -11.76                | -21.49                  |
| $C_{46}$   | -10.26               | 12.36                 | 12.22                    | 43.34                 | -14.68                  |

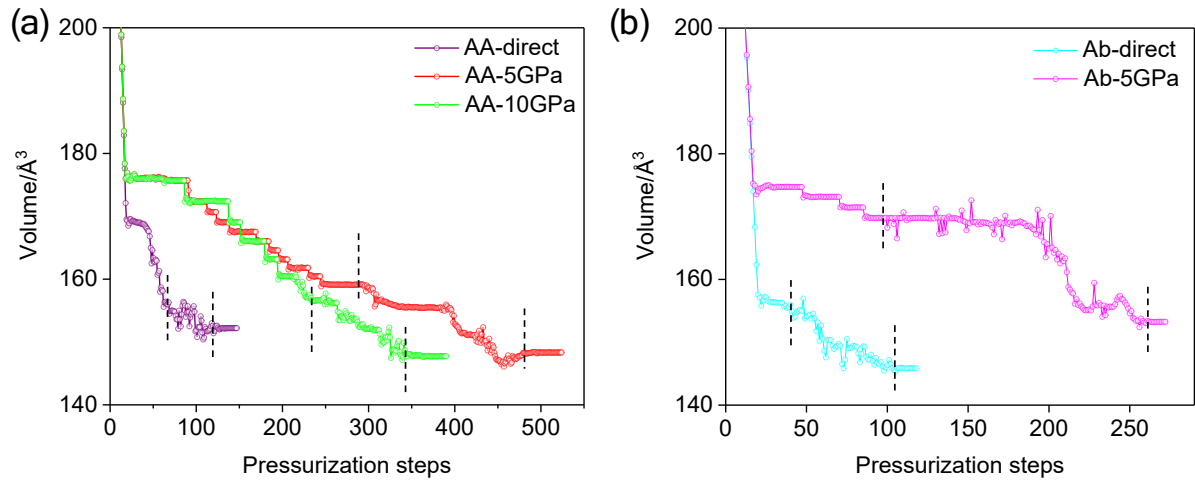

**Figure S1.** (a) is the volume change curve of AA superlattice under different pressurization methods. (b) is the volume change curve of Ab superlattice under different pressurization methods.

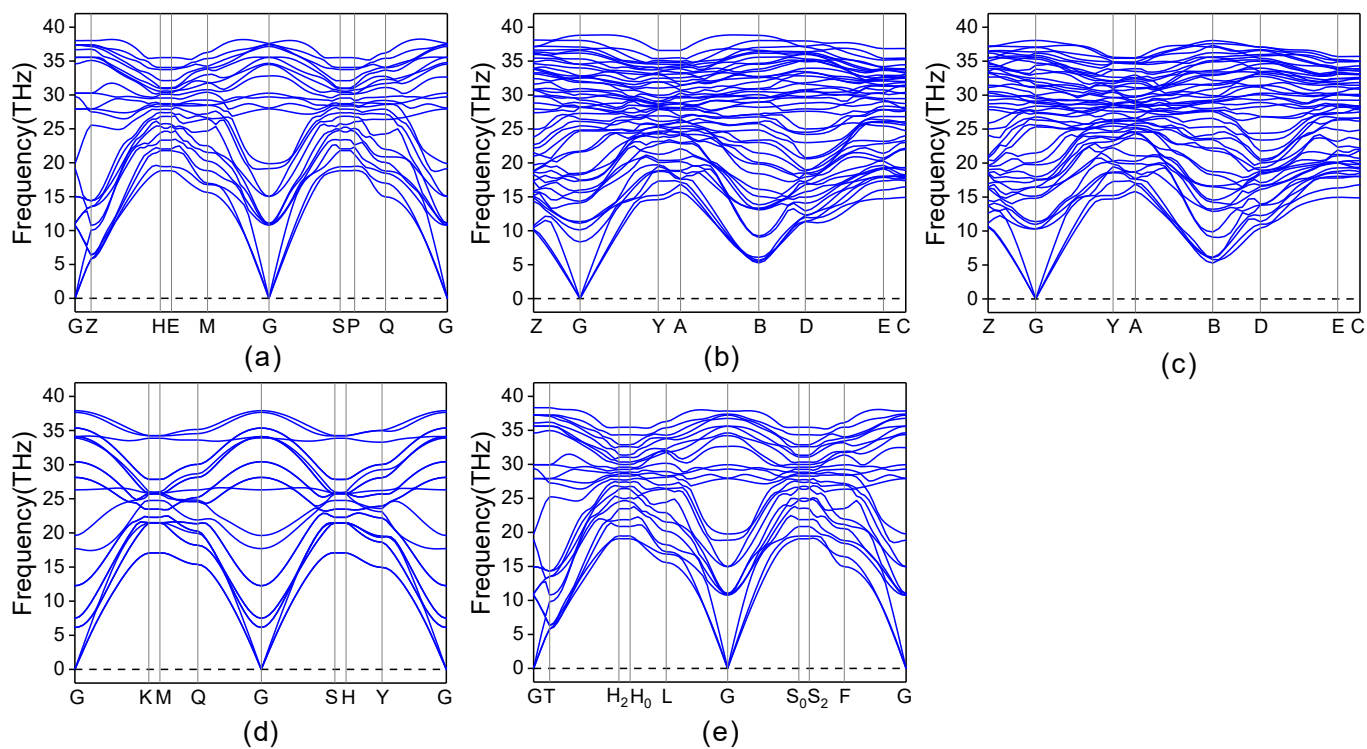

**Figure S2.** Phonon spectra of five  $\text{BC}_2\text{N}$  at ambient pressure (a)  $R3m\text{-BC}_2\text{N}$  (b)  $P2/m\text{-BC}_2\text{N}$  (c)  $P2/m\text{-BC}_2\text{N-2}$  (d)  $R\text{-}3m\text{-BC}_2\text{N}$  (e)  $R3m\text{-BC}_2\text{N-2}$ .
